# Supplementary material for: An integrated observation dataset of the hydrological and thermal deformation in permafrost slopes and engineering infrastructure in the Qinghai–Tibet Engineering Corridor
Source: Copernicus journal article supplement (doi:10.5194/essd-13-4035-2021), 2021-08-20
Supplement: Supplementary file 1 [file essd-13-4035-2021-supplement.zip]

Archive with 4 entries (4 files):
- essd-13-4035-2021-supplement-title-page.pdf
- README.html
- README.pdf
- README.md
