# Supplementary material for: An integrated observation dataset of the hydrological and thermal deformation in permafrost slopes and engineering infrastructure in the Qinghai–Tibet Engineering Corridor
Source: Copernicus journal article supplement (doi:10.5194/essd-13-4035-2021), 2021-08-20
Supplement: Supplementary file 1 [file essd-13-4035-2021-supplement.zip › essd-13-4035-2021-supplement-title-page.pdf]

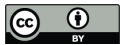

## *Supplement of*

# **An integrated observation dataset of the hydrological and thermal deformation in permafrost slopes and engineering infrastructure in the Qinghai–Tibet Engineering Corridor**

**Lihui Luo et al.**

*Correspondence to:* Lihui Luo (luolh@lzb.ac.cn)

- [essd-13-4035-2021-supplement-title-page.pdf](#)
- [README.html](#)
- [README.md](#)
- [README.pdf](#)

The copyright of individual parts of the supplement might differ from the article licence.
